# Supplementary material for: Morphological variations of the femoral head-neck junction in historical skeletal material
Source: PeerJ. 2025 Oct 16;13:e20236. doi: 10.7717/peerj.20236 (PMC12535743; doi:10.7717/peerj.20236)
Supplement: Supplemental Information 1 [file peerj-13-20236-s001.xlsx]

## Sheet: Arkusz1
No	ID	Type	Object type	DOI
1	772627	Mesh	Pelvis	https://doi.org/10.17602/M2/M772627
2	772622	Mesh	Pelvis	https://doi.org/10.17602/M2/M772622
3	772618	Mesh	Pelvis	https://doi.org/10.17602/M2/M772618
4	772617	Mesh	Pelvis	https://doi.org/10.17602/M2/M772617
5	772611	Mesh	Pelvis	https://doi.org/10.17602/M2/M772611
6	772607	Mesh	Pelvis	https://doi.org/10.17602/M2/M772607
7	772603	Mesh	Pelvis	https://doi.org/10.17602/M2/M772603
8	772599	Mesh	Pelvis	https://doi.org/10.17602/M2/M772599
9	772595	Mesh	Pelvis	https://doi.org/10.17602/M2/M772595
10	772590	Mesh	Pelvis	https://doi.org/10.17602/M2/M772590
11	772589	Mesh	Pelvis	https://doi.org/10.17602/M2/M772589
12	772583	Mesh	Pelvis	https://doi.org/10.17602/M2/M772583
13	772579	Mesh	Pelvis	https://doi.org/10.17602/M2/M772579
14	772575	Mesh	Pelvis	https://doi.org/10.17602/M2/M772575
15	772570	Mesh	Pelvis	https://doi.org/10.17602/M2/M772570
16	772569	Mesh	Pelvis	https://doi.org/10.17602/M2/M772569
17	772563	Mesh	Pelvis	https://doi.org/10.17602/M2/M772563
18	772559	Mesh	Pelvis	https://doi.org/10.17602/M2/M772559
19	772553	Mesh	Pelvis	https://doi.org/10.17602/M2/M772553
20	772552	Mesh	Pelvis	https://doi.org/10.17602/M2/M772552
21	772542	Mesh	Pelvis	https://doi.org/10.17602/M2/M772542
22	772537	Mesh	Pelvis	https://doi.org/10.17602/M2/M772537
23	772536	Mesh	Pelvis	https://doi.org/10.17602/M2/M772536
24	772529	Mesh	Pelvis	https://doi.org/10.17602/M2/M772529
25	772528	Mesh	Pelvis	https://doi.org/10.17602/M2/M772528
26	772502	Mesh	Pelvis	https://doi.org/10.17602/M2/M772502
27	772495	Mesh	Pelvis	https://doi.org/10.17602/M2/M772495
28	772490	Mesh	Pelvis	https://doi.org/10.17602/M2/M772490
29	772486	Mesh	Pelvis	https://doi.org/10.17602/M2/M772486
30	772482	Mesh	Pelvis	https://doi.org/10.17602/M2/M772482
31	772478	Mesh	Pelvis	https://doi.org/10.17602/M2/M772478
32	772473	Mesh	Pelvis	https://doi.org/10.17602/M2/M772473
33	772469	Mesh	Pelvis	https://doi.org/10.17602/M2/M772469
34	772464	Mesh	Pelvis	https://doi.org/10.17602/M2/M772464
35	772455	Mesh	Pelvis	https://doi.org/10.17602/M2/M772455
36	772454	Mesh	Pelvis	https://doi.org/10.17602/M2/M772454
37	772448	Mesh	Pelvis	https://doi.org/10.17602/M2/M772448
38	772444	Mesh	Pelvis	https://doi.org/10.17602/M2/M772444
39	772439	Mesh	Pelvis	https://doi.org/10.17602/M2/M772439
40	772438	Mesh	Pelvis	https://doi.org/10.17602/M2/M772438
41	772432	Mesh	Pelvis	https://doi.org/10.17602/M2/M772432
42	772428	Mesh	Pelvis	https://doi.org/10.17602/M2/M772428
43	772423	Mesh	Pelvis	https://doi.org/10.17602/M2/M772423
44	772422	Mesh	Pelvis	https://doi.org/10.17602/M2/M772422
45	772416	Mesh	Pelvis	https://doi.org/10.17602/M2/M772416
46	772407	Mesh	Pelvis	https://doi.org/10.17602/M2/M772407
47	742086	Mesh	Femur	https://doi.org/10.17602/M2/M742086
48	742084	Mesh	Femur	https://doi.org/10.17602/M2/M742084
49	742075	Mesh	Femur	https://doi.org/10.17602/M2/M742075
50	742072	Mesh	Femur	https://doi.org/10.17602/M2/M742072
51	742070	Mesh	Femur	https://doi.org/10.17602/M2/M742070
52	742062	Mesh	Femur	https://doi.org/10.17602/M2/M742062
53	742056	Mesh	Femur	https://doi.org/10.17602/M2/M742056
54	742054	Mesh	Femur	https://doi.org/10.17602/M2/M742054
55	742046	Mesh	Femur	https://doi.org/10.17602/M2/M742046
56	742041	Mesh	Femur	https://doi.org/10.17602/M2/M742041
57	742039	Mesh	Femur	https://doi.org/10.17602/M2/M742039
58	742032	Mesh	Femur	https://doi.org/10.17602/M2/M742032
59	742026	Mesh	Femur	https://doi.org/10.17602/M2/M742026
60	742025	Mesh	Femur	https://doi.org/10.17602/M2/M742025
61	742017	Mesh	Femur	https://doi.org/10.17602/M2/M742017
62	742012	Mesh	Femur	https://doi.org/10.17602/M2/M742012
63	742006	Mesh	Femur	https://doi.org/10.17602/M2/M742006
64	742004	Mesh	Femur	https://doi.org/10.17602/M2/M742004
65	741997	Mesh	Femur	https://doi.org/10.17602/M2/M741997
66	741992	Mesh	Femur	https://doi.org/10.17602/M2/M741992
67	741987	Mesh	Femur	https://doi.org/10.17602/M2/M741987
68	741982	Mesh	Femur	https://doi.org/10.17602/M2/M741982
69	741977	Mesh	Femur	https://doi.org/10.17602/M2/M741977
70	741972	Mesh	Femur	https://doi.org/10.17602/M2/M741972
71	741967	Mesh	Femur	https://doi.org/10.17602/M2/M741967
72	741962	Mesh	Femur	https://doi.org/10.17602/M2/M741962
73	741957	Mesh	Femur	https://doi.org/10.17602/M2/M741957
74	741120	Mesh	Femur	https://doi.org/10.17602/M2/M741120
75	741115	Mesh	Femur	https://doi.org/10.17602/M2/M741115
76	741110	Mesh	Femur	https://doi.org/10.17602/M2/M741110
77	741105	Mesh	Femur	https://doi.org/10.17602/M2/M741105
78	741100	Mesh	Femur	https://doi.org/10.17602/M2/M741100
79	741095	Mesh	Femur	https://doi.org/10.17602/M2/M741095
80	741090	Mesh	Femur	https://doi.org/10.17602/M2/M741090
81	741085	Mesh	Femur	https://doi.org/10.17602/M2/M741085
82	741080	Mesh	Femur	https://doi.org/10.17602/M2/M741080
83	741075	Mesh	Femur	https://doi.org/10.17602/M2/M741075
84	741070	Mesh	Femur	https://doi.org/10.17602/M2/M741070
85	741065	Mesh	Femur	https://doi.org/10.17602/M2/M741065
86	741060	Mesh	Femur	https://doi.org/10.17602/M2/M741060
87	741055	Mesh	Femur	https://doi.org/10.17602/M2/M741055
88	741049	Mesh	Femur	https://doi.org/10.17602/M2/M741049
89	741040	Mesh	Femur	https://doi.org/10.17602/M2/M741040
90	741033	Mesh	Femur	https://doi.org/10.17602/M2/M741033
91	741022	Mesh	Femur	https://doi.org/10.17602/M2/M741022
92	741017	Mesh	Femur	https://doi.org/10.17602/M2/M741017
93	741012	Mesh	Femur	https://doi.org/10.17602/M2/M741012
94	741006	Mesh	Femur	https://doi.org/10.17602/M2/M741006
95	741000	Mesh	Femur	https://doi.org/10.17602/M2/M741000
