# Supplementary material for: Morphological variations of the femoral head-neck junction in historical skeletal material
Source: PeerJ. 2025 Oct 16;13:e20236. doi: 10.7717/peerj.20236 (PMC12535743; doi:10.7717/peerj.20236)
Supplement: Supplemental Information 2 [file peerj-13-20236-s002.docx]

**Supplementary material**

**Title:** Femoral head-neck junction changes in skeletal material

**Authors:** Anna Myszka; Anna Maria Kubicka*;

1Institute of Biological Science, Cardinal Stefan Wyszynski University in Warsaw, Poland

2Department of Zoology, Poznan University of Life Sciences, Poland

3PaleoFED Team, UMR 7194 Histoire Naturelle de l'Homme Préhistorique, CNRS, Département Homme et Environnement, Muséum national d'Histoire naturelle, Paris, France

*Corresponding author

Figures: 1

| 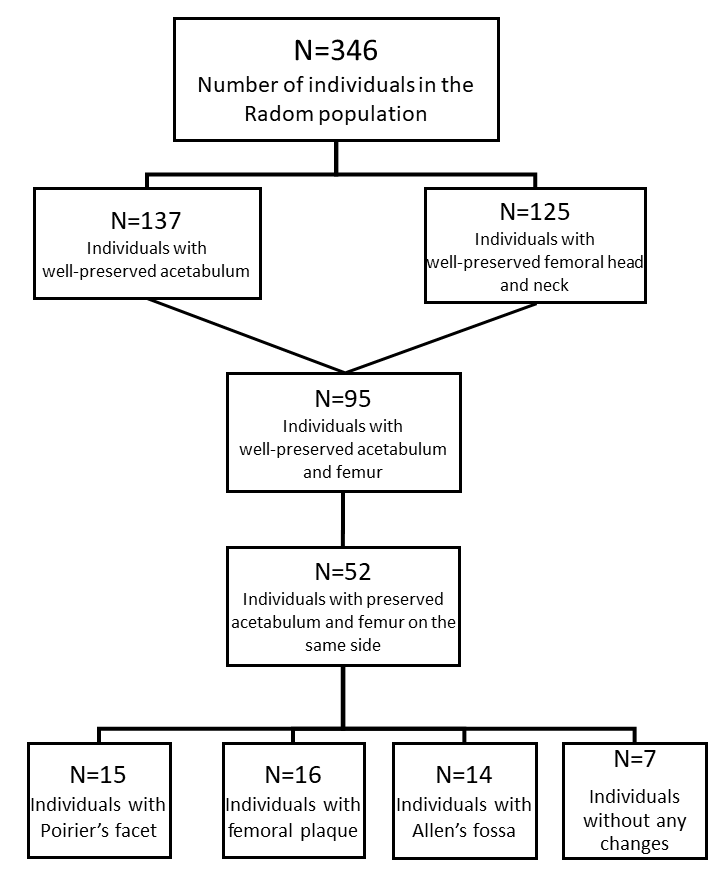 |
| --- |
| Figure S1. Flowchart showing the selection of bones for analysis |
